# Supplementary material for: Identification of calcium binding sites on calsequestrin 1 and their implications for polymerization
Source: Royal Society of Chemistry journal article supplement (doi:10.1039/c3mb25588c), 2013-04-10
Supplement: c3mb25588c.pdf [file c3mb25588c.pdf]

**MB-ART-12-2012-025588**

## **Identification of Calcium binding sites on calsequestrin 1 and its implications to polymerization**

**Amit Kumar<sup>1,#</sup>, Harapriya Chakravarty<sup>2,#</sup>, Naresh C. Bal<sup>3,#,\*</sup>, Tuniki Balaraju<sup>2</sup>, Nivedita Jena<sup>4</sup>, Gauri Misra<sup>5</sup>, Chandralata Bal<sup>2</sup>, Enrico Pieroni<sup>1</sup>, Muthu Periasamy<sup>3,6</sup>, and Ashoke Sharon<sup>2,\*</sup>**

<sup>1</sup>CRS4, Bioengineering group, Science and Technology Park Polaris, Piscina Manna, 09010 Pula (CA). Italy; <sup>2</sup>Department of Applied Chemistry, Birla Institute of Technology, Mesra, Ranchi, Jharkhand 835215, India; <sup>3</sup>Department of Physiology and Cell Biology, The Ohio State University, College of Medicine, Columbus, OH 43210, United States; <sup>4</sup>Division of Medicinal Chemistry and Pharmacognosy, College of Pharmacy, The Ohio State University, Columbus, OH 43210, United States; <sup>5</sup>Institute of Biotechnology, Amity University, Noida, India and <sup>6</sup>Davis Heart and Lung Research Institute, Ohio State University, Columbus, Ohio, USA.

<sup>#</sup>The authors contributed equally.

### **\*Corresponding Authors:**

**Ashoke Sharon;** Department of Applied Chemistry, Birla Institute of Technology, Mesra, Ranchi, Jharkhand, India-835215. **Tel: 91-651-2276531; Fax: 91-651-2275401;** Email: [asharon@bitmesra.ac.in](mailto:asharon@bitmesra.ac.in)

Or,

**Naresh C. Bal;** Department of Physiology and Cell Biology, The Ohio State University, College of Medicine, Columbus, OH 43210, United States. **Tel: 1614-688-4635; Fax: 1614-2924888;** Email: [bal.8@osu.edu](mailto:bal.8@osu.edu)

**MB-ART-12-2012-025588**

**Table S1:** RMSD and Entropy calculations for CASQ1 in various systems at different  $[\text{Ca}^{2+}]$ .

| <b>Simulation system</b><br>(with number of $\text{Ca}^{2+}$ ions) | <b>RMSD of backbone atoms</b><br>(in Å) |           |           | <b>Entropy</b><br>(in J/molK) |
|--------------------------------------------------------------------|-----------------------------------------|-----------|-----------|-------------------------------|
|                                                                    | CHAIN C                                 | CHAIN B   | DIMER     | C-TER (residues 350-364)      |
| <b>120</b>                                                         | 2.8+/-0.5                               | 2.7+/-0.7 | 3.3+/-0.7 | 1715                          |
| <b>80</b>                                                          | 3.2+/-0.7                               | 2.8+/-0.4 | 3.5+/-0.7 | 1705                          |
| <b>40</b>                                                          | 3.0+/-0.8                               | 3.9+/-0.8 | 4.9+/-1.2 | 1859                          |
| <b>20</b>                                                          | 2.7+/-0.5                               | 2.9+/-0.6 | 4.5+/-1.4 | 1896                          |
| <b>0</b>                                                           | 3.5+/-0.6                               | 4.0+/-0.9 | 5.7+/-1.4 | 1875                          |

MB-ART-12-2012-025588

## Supplemental Figure 1

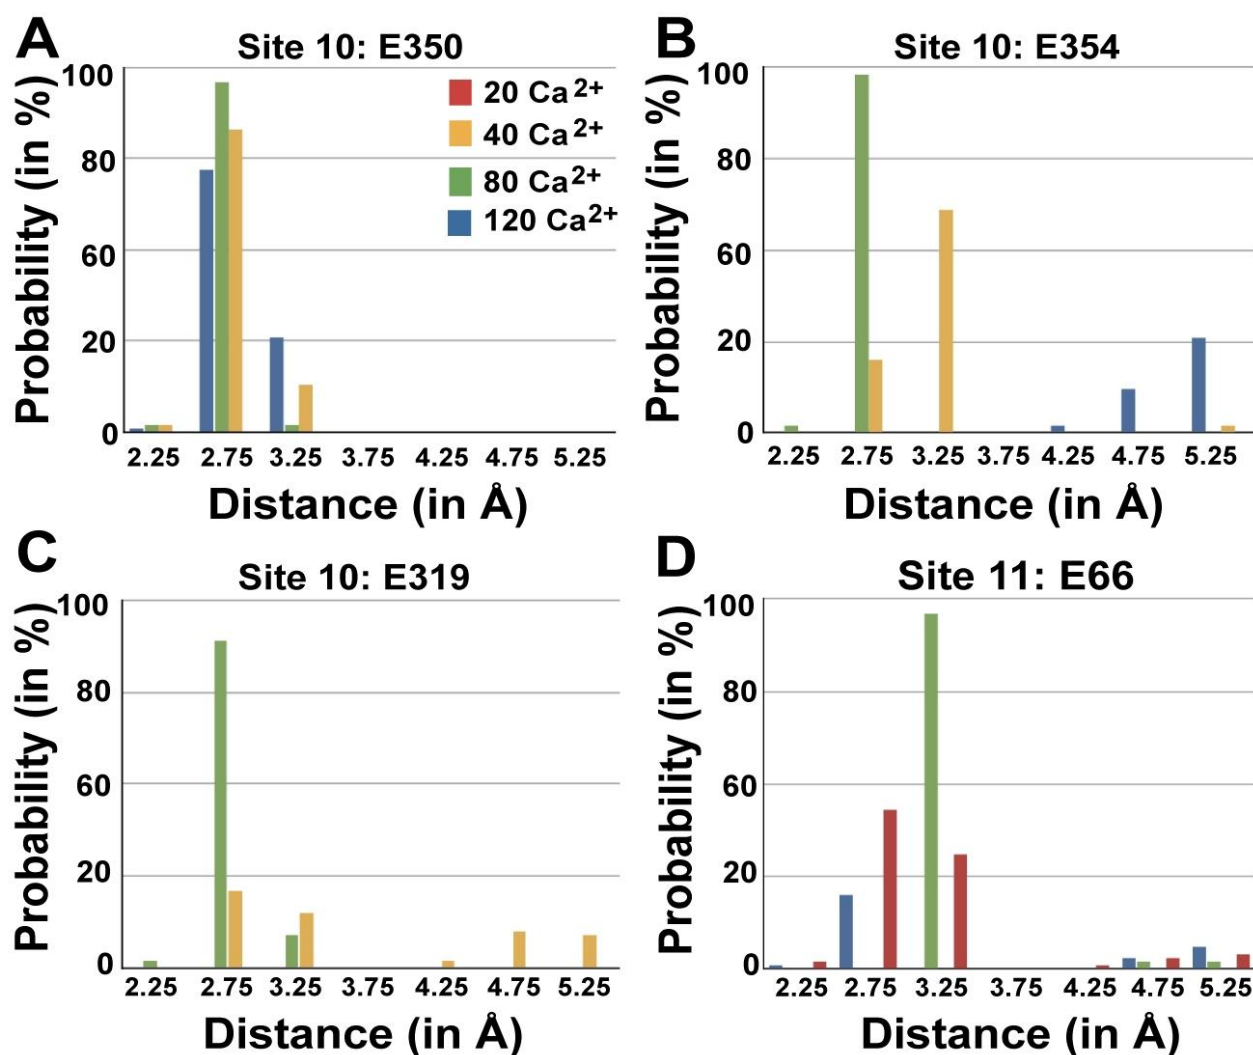

**Supplemental Figure 1: Probability of Ca<sup>2+</sup>-binding at the [Ca<sup>2+</sup>] dependent intermediate affinity sites on CASQ1.** The site 10 (constituted by residues E319, E350 and E354) on CASQ1 is shown as an example of [Ca<sup>2+</sup>] dependent intermediate affinity sites. **(A)** Residue E350 of site 10 show high probability of Ca<sup>2+</sup>-binding at distance below 3.0Å when [Ca<sup>2+</sup>] in the system is 40 and above. **(B)** Residue E354 in site 10 show high probability of Ca<sup>2+</sup>-binding at distance around 3.0Å only when 40 or 80 Ca<sup>2+</sup> ions are present in the system. But in the system with 120 Ca<sup>2+</sup> ions the distance between the Ca<sup>2+</sup> ions and the residue is high. **(C)** E319 binds Ca<sup>2+</sup> ion with very high affinity and geometry when system [Ca<sup>2+</sup>] is 80. E319 does not bind Ca<sup>2+</sup> ions when [Ca<sup>2+</sup>] in the system increased to 120. **(D)** Site 11 (formed by single acidic residue E66) on CASQ1 is a [Ca<sup>2+</sup>] independent low affinity site. Many (~25 sites) Ca<sup>2+</sup>-binding sites were found on CASQ1 surface that bind Ca<sup>2+</sup> without any specific geometry at any [Ca<sup>2+</sup>] randomly.

MB-ART-12-2012-025588

## Supplemental Figure 2

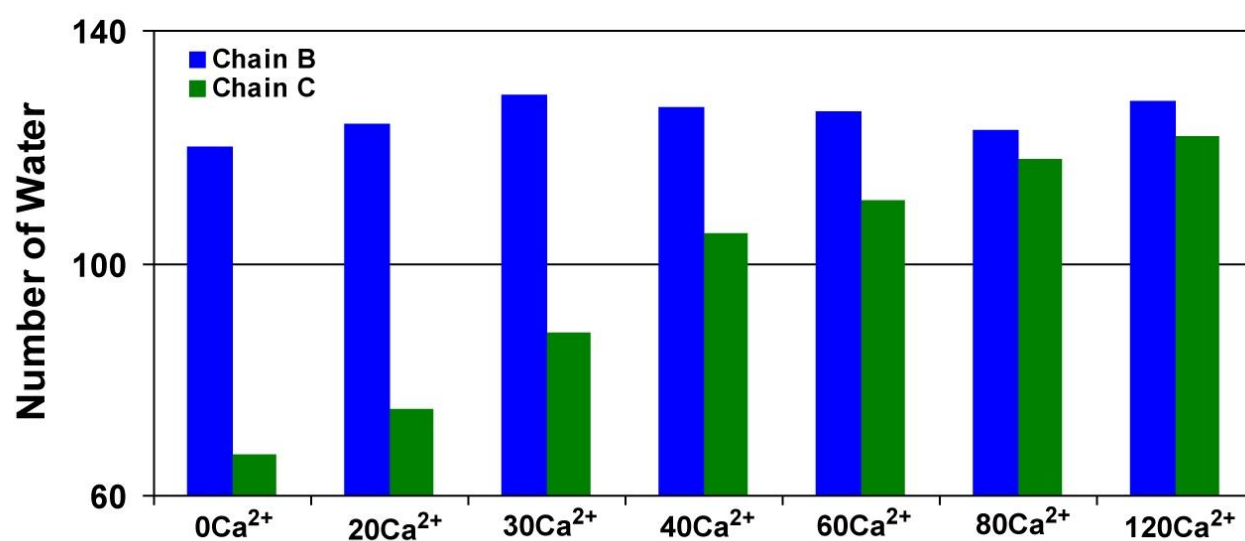

**Supplemental Figure 2: Presence of water molecules around the CAS region of each CASQ1 chain.** CAS of chain B which is located at the inter-molecular back-to-back dimeric interface of CASQ1 does not show  $\text{Ca}^{2+}$ -dependent water binding. On the other hand the CAS of chain C bind more water with increasing  $\text{Ca}^{2+}$ -binding. It is important to point out that the back-to-back stacking which is stabilized by hydrophobic interactions is not dependent on water mediated stabilization unlike the free CAS.

MB-ART-12-2012-025588

## Supplemental Figure 3

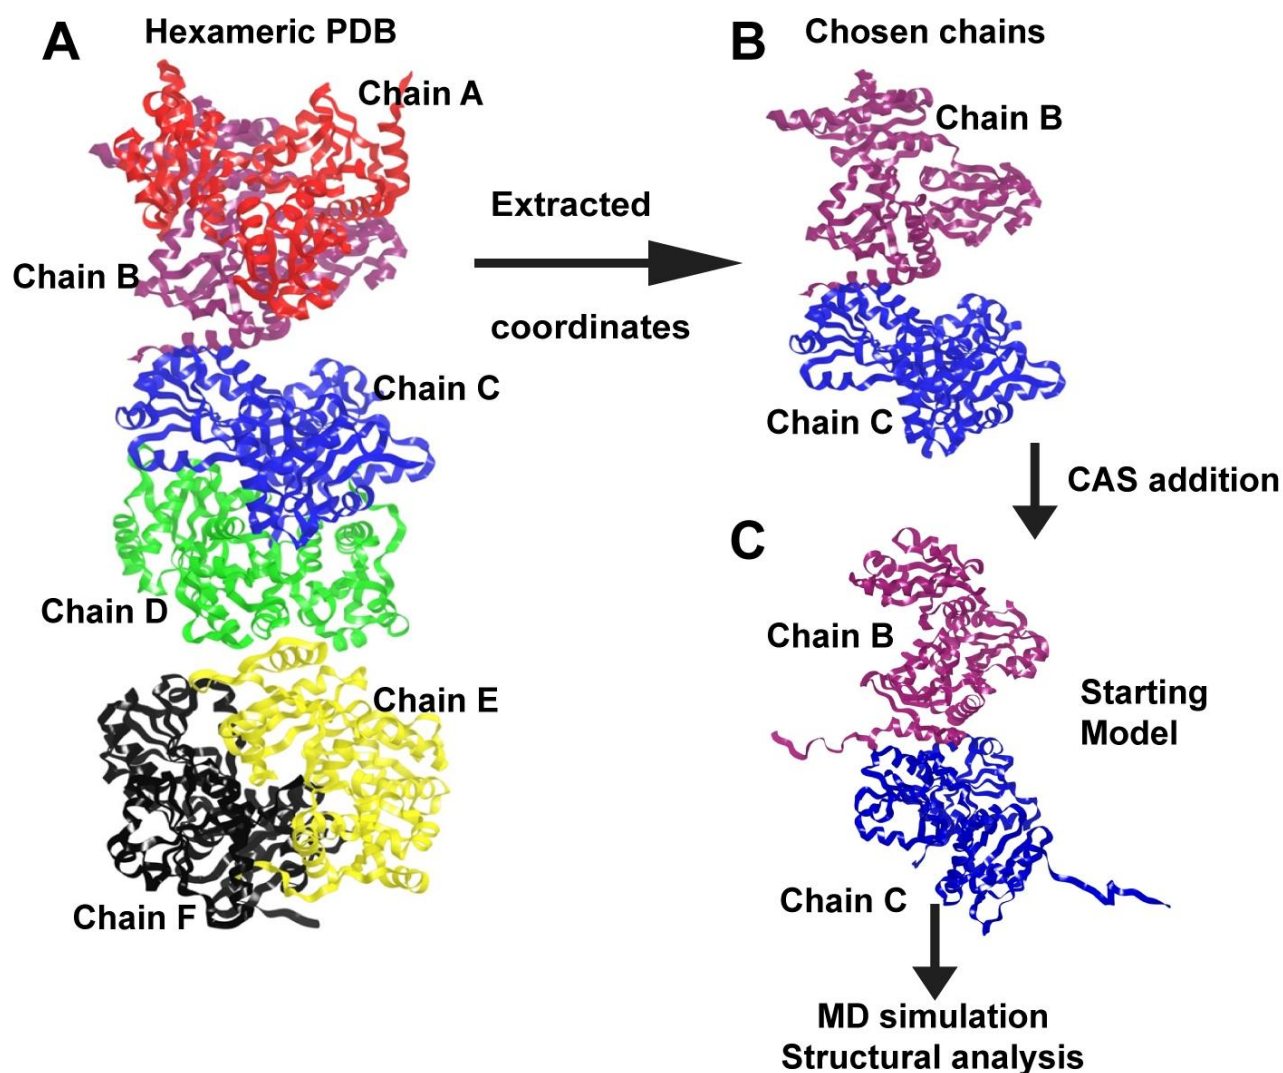

**Supplemental Figure 3: The flow chart of method employed in this paper.** (A) The hexameric PDB id: 3UOM. (B) Borrowed the coordinates for the chain B and C that are in back-to-back interaction. (C) C-terminal missing residues are added and the incorrect residues are corrected.
